# Supplementary material for: Daily evaluation of 26 precipitation datasets using Stage-IV gauge-radar data for the CONUS
Source: Copernicus journal article supplement (doi:10.5194/hess-23-207-2019), 2019-01-16
Supplement: Supplementary file 1 [file hess-23-207-2019-supplement.pdf]

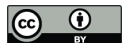

## *Supplement of*

# **Daily evaluation of 26 precipitation datasets using Stage-IV gauge-radar data for the CONUS**

**Hylke E. Beck et al.**

*Correspondence to:* Hylke E. Beck ([hylke.beck@gmail.com](mailto:hylke.beck@gmail.com))

The copyright of individual parts of the supplement might differ from the CC BY 4.0 License.

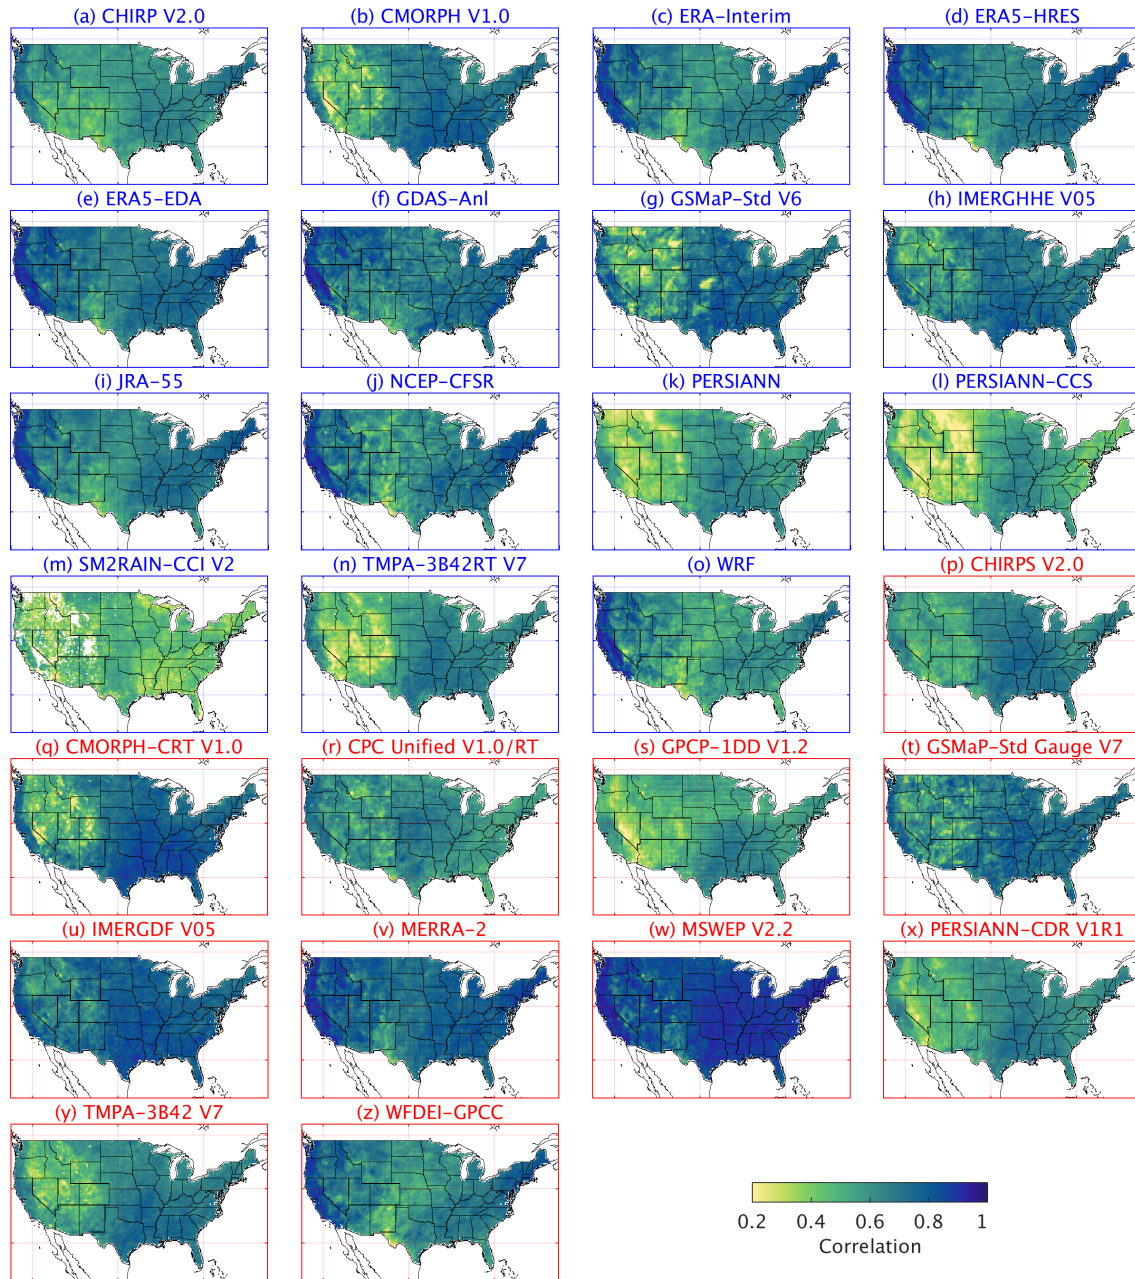

**Supplement Figure S1.** Correlations for the 26 gridded  $P$  datasets using the Stage-IV gauge-radar dataset as reference. White indicates missing data. Higher correlations correspond to better performance. Uncorrected datasets are listed in blue, whereas gauge-corrected datasets are listed in red.

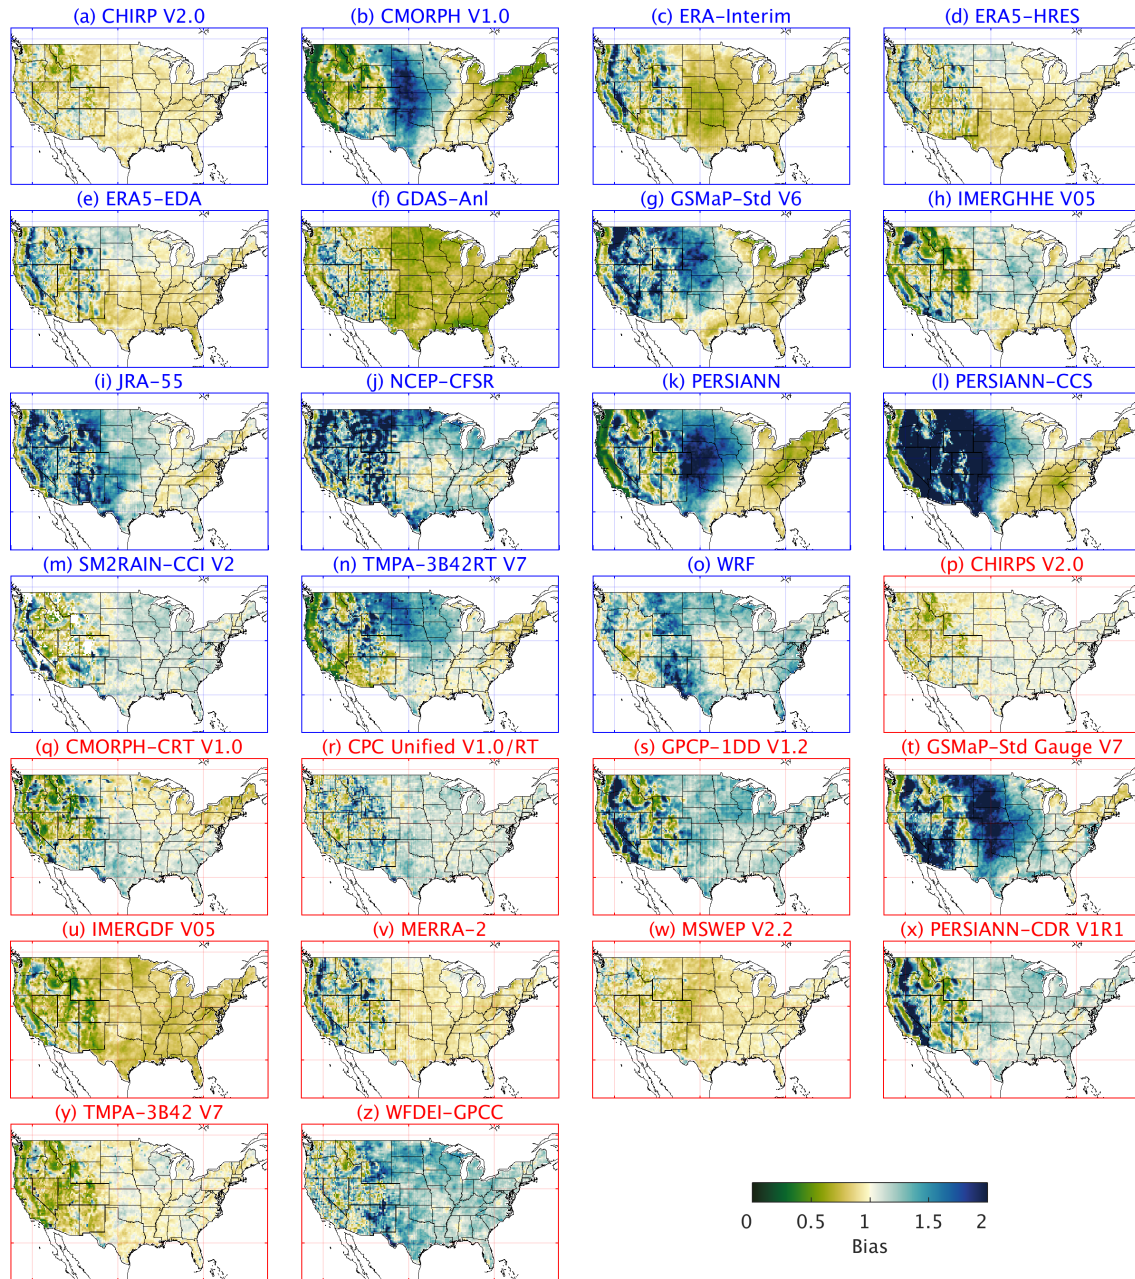

**Supplement Figure S2.** Bias values for the 26 gridded  $P$  datasets using the Stage-IV gauge-radar dataset as reference. White indicates missing data. Values closer to 1 correspond to better performance. Uncorrected datasets are listed in blue, whereas gauge-corrected datasets are listed in red.



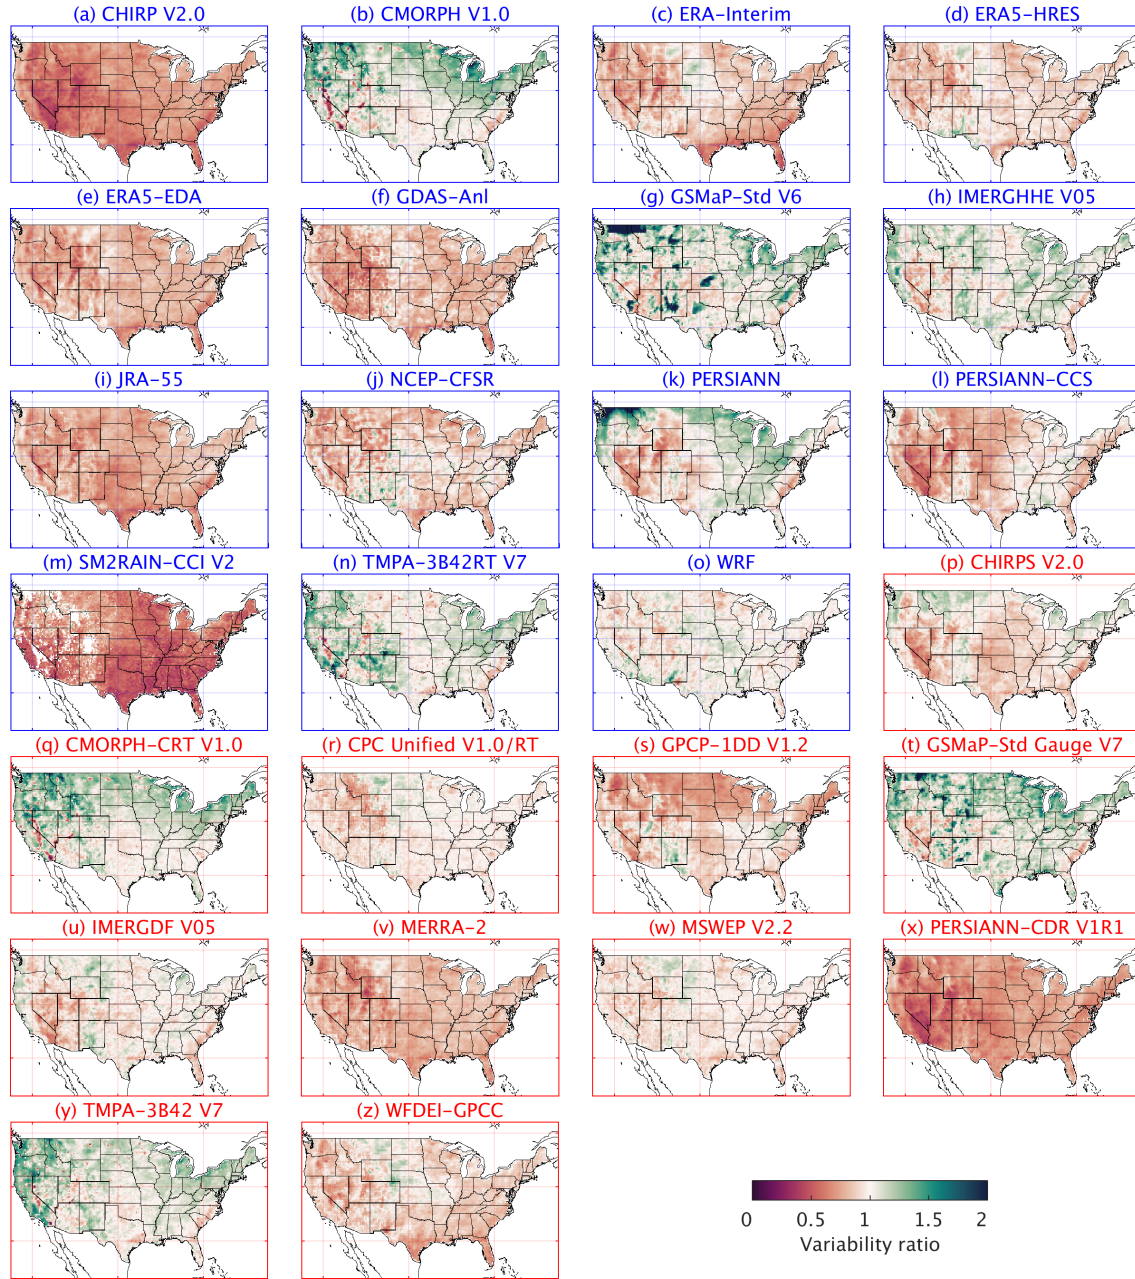

**Supplement Figure S3.** Variability ratios for the 26 gridded  $P$  datasets using the Stage-IV gauge-radar dataset as reference. White indicates missing data. Values closer to 1 correspond to better performance. Uncorrected datasets are listed in blue, whereas gauge-corrected datasets are listed in red.
